# Supplementary material for: Preparation and characterisation of uranium oxides with spherical shapes and hierarchical structures
Source: Royal Society of Chemistry journal article supplement (doi:10.1039/c4ce00850b), 2014-01-01
Supplement: c4ce00850b1.pdf [file c4ce00850b1.pdf]

## Supplementary material

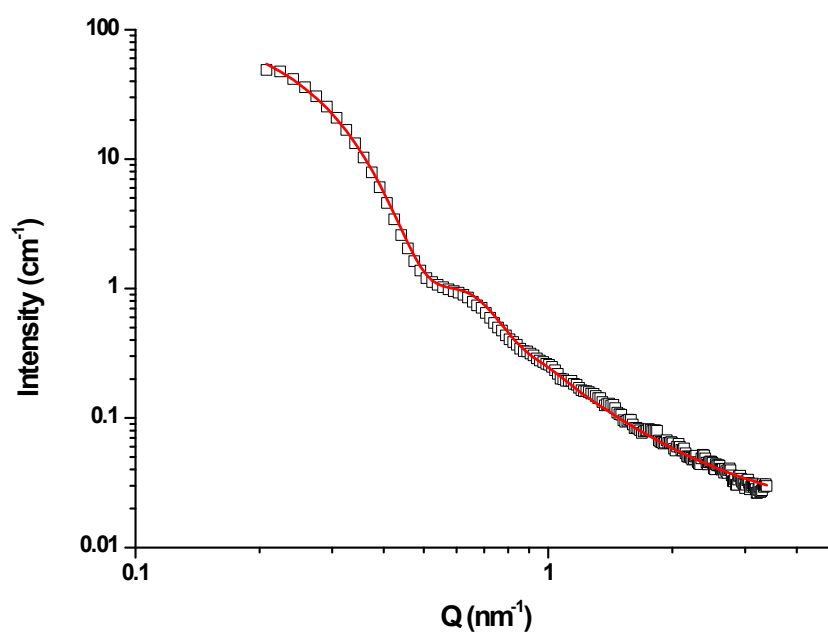

**Figure S1.** SAXS profile of the U(IV)-based sample heated at 90°C for 120 min (squares). The red line represents the calculation of the form factor of spheres with a diameter of 16.4 nm (FWHM = 5 nm).
